# Supplementary material for: Optimization of the synergistic effects in polycrystalline Pt–Au electrodes in developing an effective arsenic sensor via oxidation reactions
Source: Royal Society of Chemistry journal article supplement (doi:10.1039/d4nj03312d), 2024-01-01
Supplement: d4nj03312d1.pdf [file d4nj03312d1.pdf]

## Supplementary Information

# Optimization of the Synergistic Effects in Polycrystalline Pt-Au Electrodes in Developing an Effective Arsenic Sensor via Oxidation Reactions

Mohammad Imran Hossain <sup>a</sup>, Surove Rani Saha <sup>a</sup>, Kentaro Aoki <sup>b</sup>, Md. Mahfujul Alam <sup>a</sup>, Nayan Ranjan Singha <sup>c</sup>, Mostafizur Rahaman <sup>d</sup>, Ali Aldalbahi <sup>d</sup>, Yuki Nagao <sup>b</sup>, Mohammad A. Hasnat <sup>a, e, \*</sup>

<sup>a</sup> *Electrochemistry & Catalysis Research Laboratory (ECRL), Department of Chemistry, School of Physical Sciences, Shahjalal University of Science and Technology, Sylhet-3114, Bangladesh*

<sup>b</sup> *School of Materials Science, Japan Advanced Institute of Science and Technology, 1-1 Asahidai, Nomi, Ishikawa 923-1292, Japan*

<sup>c</sup> *Advanced Polymer Laboratory, Department of Polymer Science and Technology, Government College of Engineering and Leather Technology (Post-Graduate), Kolkata-700106, West Bengal, India*

<sup>d</sup> *Department of Chemistry, College of Science, King Saud University, P.O. Box 2455, Riyadh 11451, Saudi Arabia*

<sup>e</sup> *International Research Organization for Advanced Science and Technology (IROAST), Kumamoto University, Kumamoto 860-8555, Japan*

**\*Corresponding Author:** Mohammad A. Hasnat (Email: [mah-che@sust.edu](mailto:mah-che@sust.edu))

### Text S1. Stability test

To assess the stability performance of the (Pt-Au)<sub>8</sub> electrode, accelerated CV cycling at a scan rate of 100 mVs<sup>-1</sup> was carried out for 500 consecutive cycles in a 10 mL 2 mM As(III) solution.

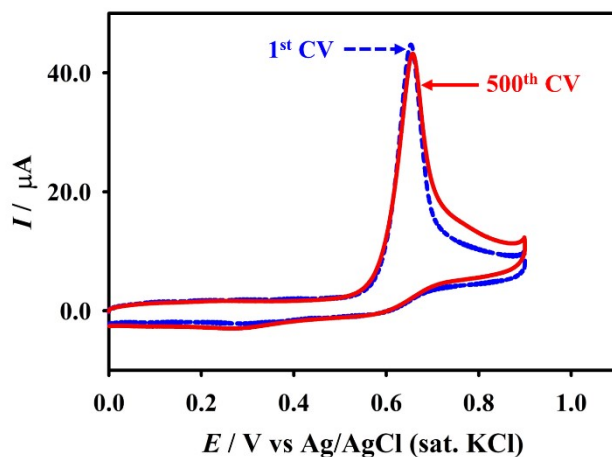

**Figure S1.** CVs of As(III) oxidation reaction obtained using  $(\text{Pt-Au})_8$  electrode for 2 mM As(III) solution diluted in 0.1 M  $\text{H}_2\text{SO}_4$  solution during the 1<sup>st</sup> and 500<sup>th</sup> potential scanning.

### Text S2. Real sample analysis

To prepare real samples for evaluating the electrode's performance, 5 mL of groundwater collected from four different districts in Bangladesh was mixed with 5 mL of 0.1 M  $\text{H}_2\text{SO}_4$  solution, followed by the addition of 100  $\mu\text{L}$  of 0.1 M As(III) solution, resulting in a final concentration of 1 mM As(III). To assess potential interference from the real matrix, a standard solution was prepared by replacing the groundwater with an equal volume of deionized (DI) water. Linear sweep voltammograms (LSVs) corresponding to the 1 mM As(III) solutions prepared with groundwater of four different districts along with one standard solution are provided below.

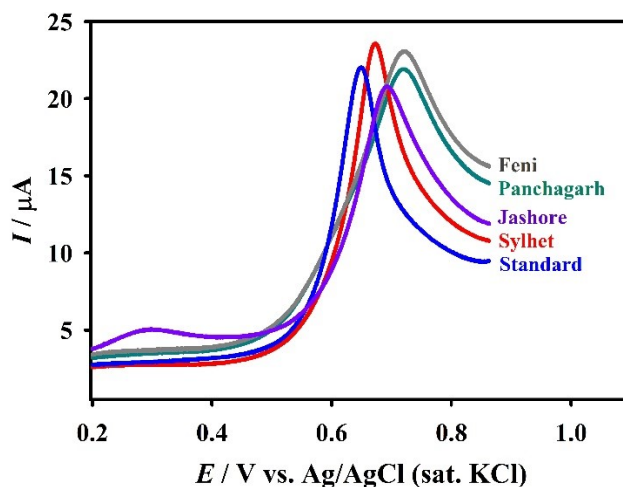

**Figure S2.** Linear sweep voltammograms (LSVs) obtained for real groundwater samples collected from different districts in Bangladesh recorded using (Pt-Au)<sub>8</sub> electrode at a scan rate of 0.1 V s<sup>-1</sup> for 1 mM As(III) solutions.
